# Supplementary material for: Electrochemical performance of M(dca)2pyz (M = Fe, Co and Ni) MOFs as sustainable anodes in lithium-ion batteries
Source: Royal Society of Chemistry journal article supplement (doi:10.1039/d4ta02137a), 2024-01-01
Supplement: d4ta02137a1.pdf [file d4ta02137a1.pdf]

## Supporting information

### Electrochemical Performance of M(dca)<sub>2</sub>pyz (M= Fe, Co, and Ni) MOFs as Sustainable Anodes in Lithium-Ion Batteries

Isabel Ciria-Ramos<sup>a,b</sup>, Alberto García-Fernández<sup>c</sup>, Álvaro Mayoral<sup>a</sup>, Alodia Orera<sup>a</sup>, Emilio J. Juárez-Perez<sup>a,d,\*</sup> and Marta Haro<sup>a,b,\*</sup>

<sup>a</sup> Instituto de Nanociencia y Materiales de Aragón (INMA), CSIC-Universidad de Zaragoza, Zaragoza, 50009, Spain

<sup>b</sup> Departamento de Química Física, Facultad de Ciencias, Universidad de Zaragoza, Plaza San Francisco, Zaragoza, 50009, Spain

<sup>c</sup> Division of Applied Physical Chemistry, Department of Chemistry, KTH Royal Institute of Technology, SE-100 44 Stockholm, Sweden

<sup>d</sup> Aragonese Foundation for Research and Development (ARAID). Government of Aragon, Zaragoza, 50018, Spain

[\\*mharo@unizar.es](mailto:mharo@unizar.es); [ejuarezperez@unizar.es](mailto:ejuarezperez@unizar.es)

## Table of contents

|                                                                                                                                   |    |
|-----------------------------------------------------------------------------------------------------------------------------------|----|
| <b>Figure S1.</b> Room temperature PXRD of the three MOFs .....                                                                   | 3  |
| <b>Figure S2.</b> SEM images of the MOFs.....                                                                                     | 4  |
| <b>Figure S3.</b> N <sub>2</sub> adsorption isotherms of the MOFs .....                                                           | 5  |
| <b>Figure S4.</b> TGA curves of the MOFs .....                                                                                    | 6  |
| <b>Figure S5.</b> Raman spectra of the three MOFs in the region of D and G bands.....                                             | 7  |
| <b>Figure S6.</b> EIS spectra used for obtaining MOFs electronic conductivity.....                                                | 8  |
| <b>Figure S7.</b> Rate capability of carbon black.....                                                                            | 9  |
| <b>Figure S8.</b> Rate capability of the MOFs including the first cycle .....                                                     | 10 |
| <b>Figure S9.</b> Cycling performance of Co-MOF and Ni-MOF .....                                                                  | 11 |
| <b>Figure S10.</b> EEL spectra of Fe-MOF and Co-MOF.....                                                                          | 12 |
| <b>Figure S11.</b> First three CVs of the MOFs.....                                                                               | 13 |
| <b>Figure S12.</b> Rate capability of the ligands dca and pyz.....                                                                | 15 |
| <b>Figure S13.</b> Resistances and capacitances of the MOFs calculated from the fit to the proposed equivalent circuit model..... | 16 |
| <b>Table S1.</b> Comparison of M(dca) <sub>2</sub> pyz specific capacity with TMNs literature.....                                | 17 |
| <b>Table S2.</b> Comparison of M(dca) <sub>2</sub> pyz specific capacity with MOFs literature.....                                | 19 |
| <b>References</b> .....                                                                                                           | 21 |

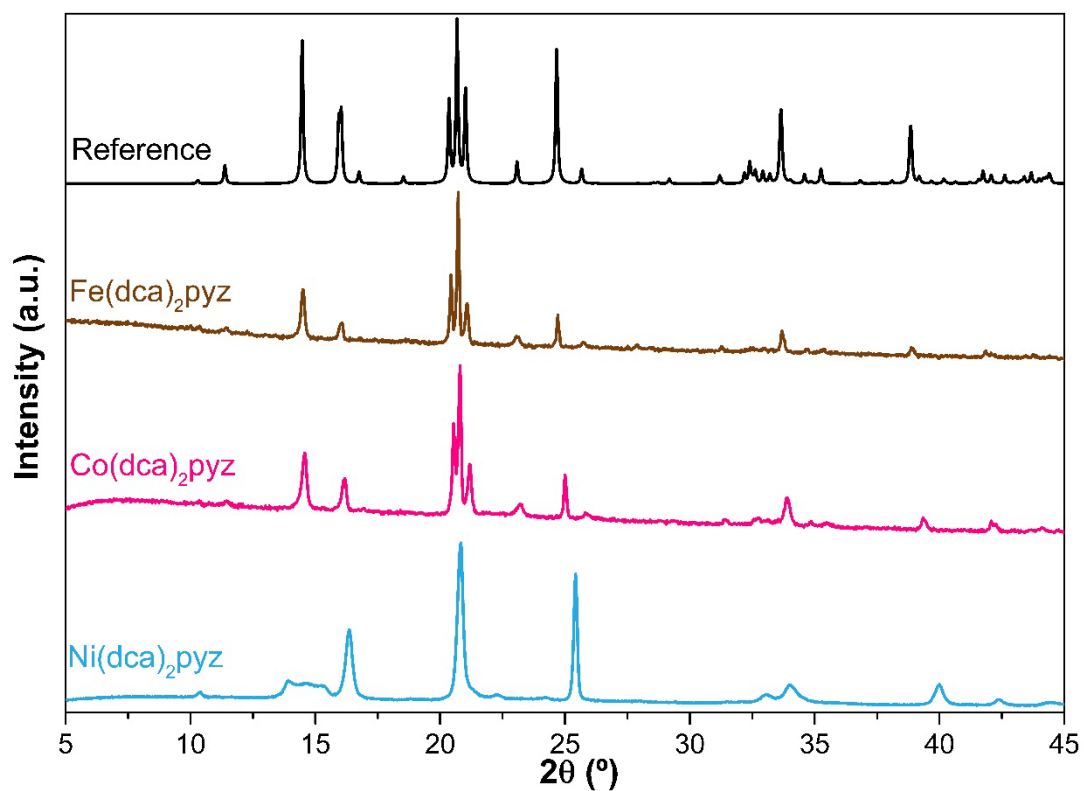

**Figure S1.** Room temperature PXRD patterns for the as-prepared  $M(dca)_2pyz$  ( $M= Fe, Co$  or  $Ni$ ) compounds and the simulated one based on the single crystal data obtained at room temperature.<sup>1</sup>

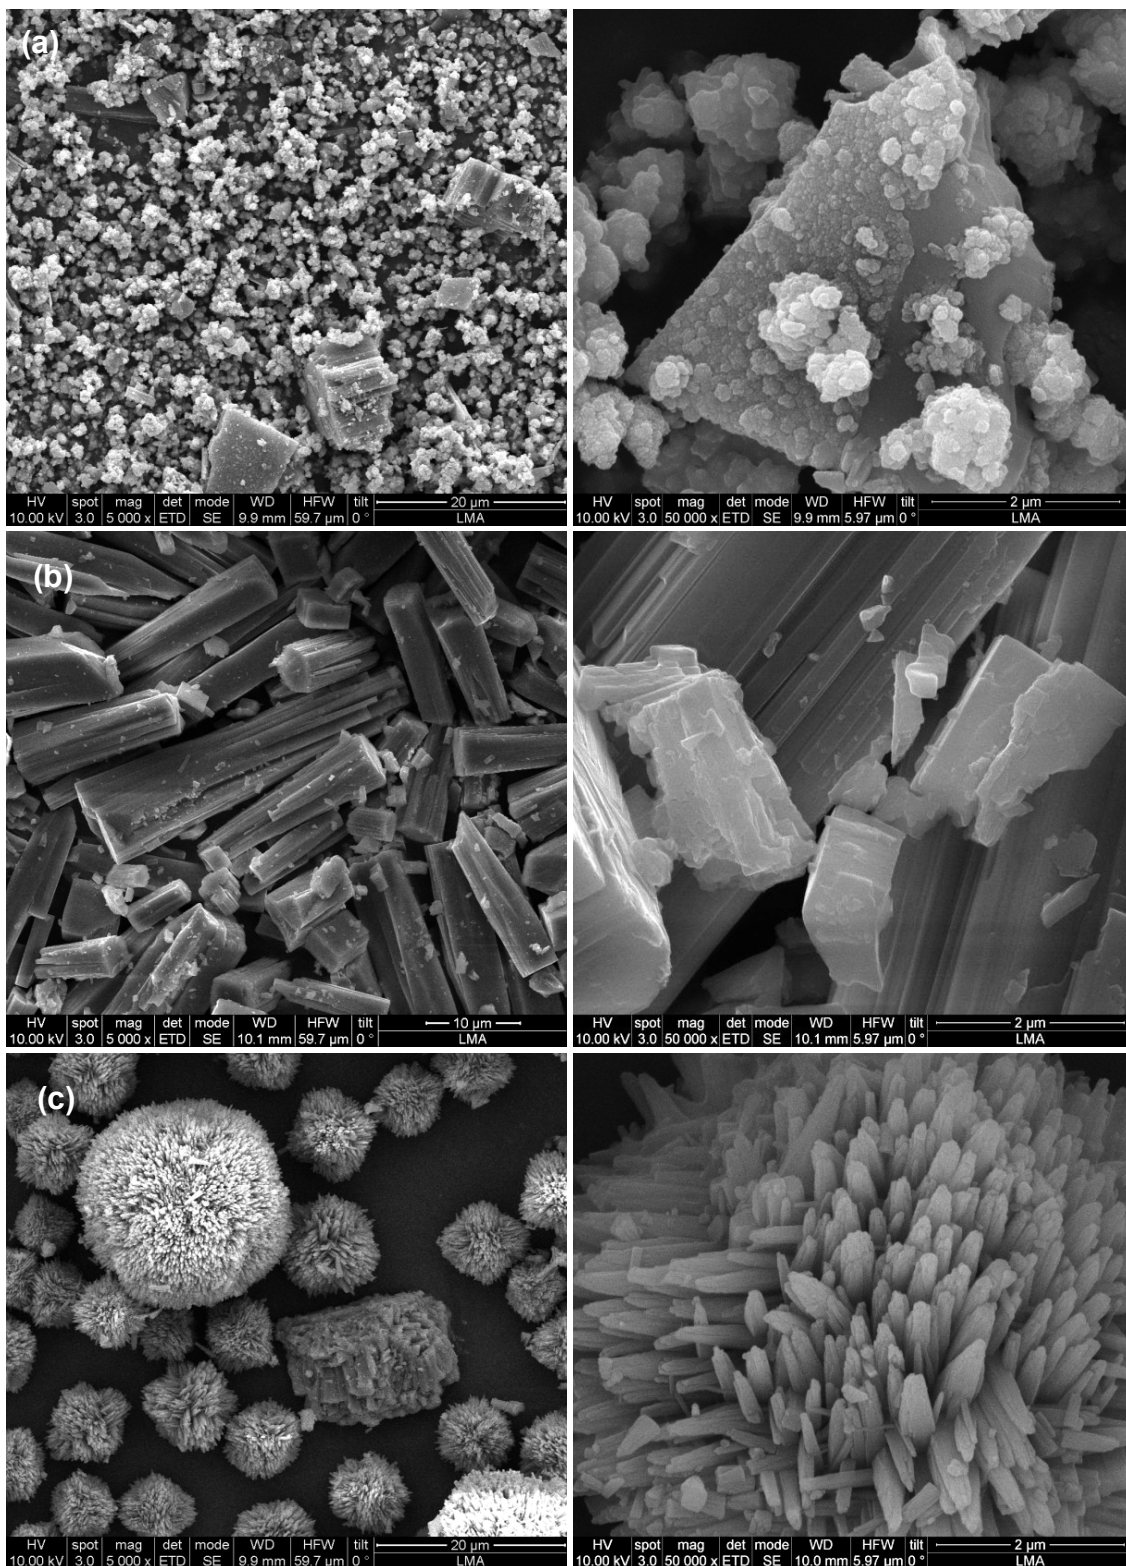

**Figure S2.** SEM images of a) Fe(dca)<sub>2</sub>pyz, b) Co(dca)<sub>2</sub>pyz and c) Ni(dca)<sub>2</sub>pyz.

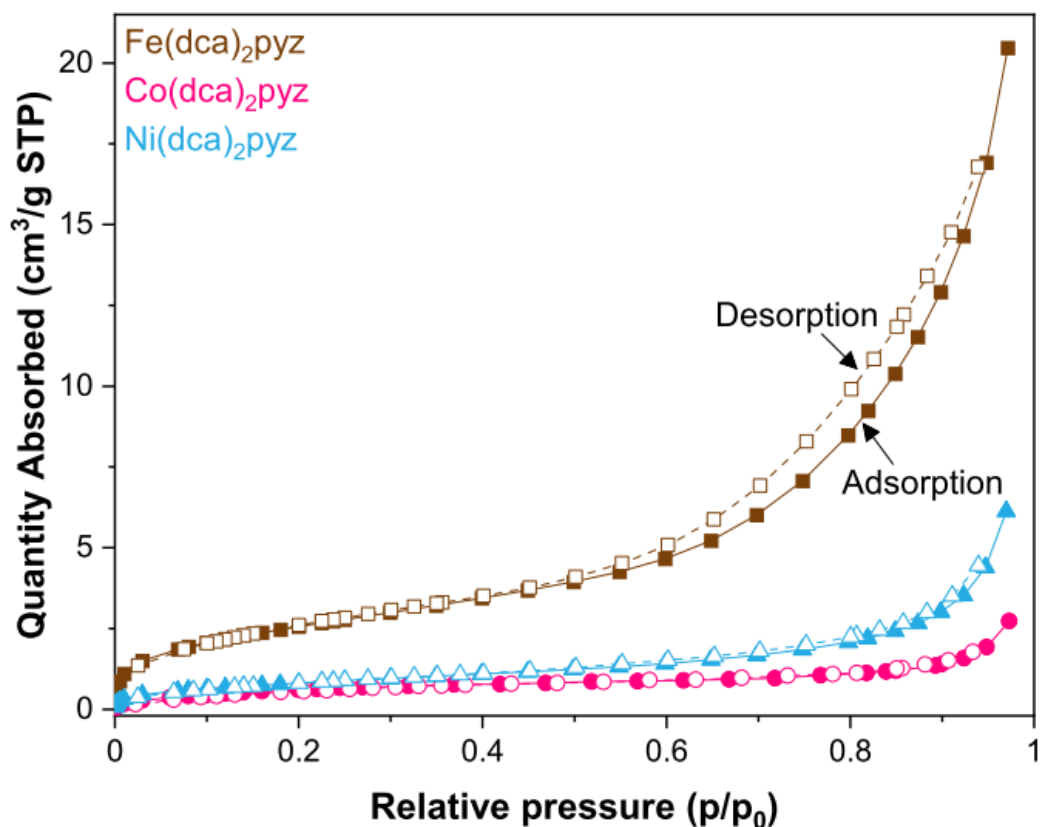

**Figure S3.** N<sub>2</sub> adsorption isotherms of Ni(dca)<sub>2</sub>pyz, Co(dca)<sub>2</sub>pyz, and Fe(dca)<sub>2</sub>pyz.

N<sub>2</sub> adsorption isotherms at 77 K in a Micromeritics TriStar 3000 established the specific surface area and pore volume distribution for samples previously out-gassed during 10 h at 200 °C and 20 Pa.

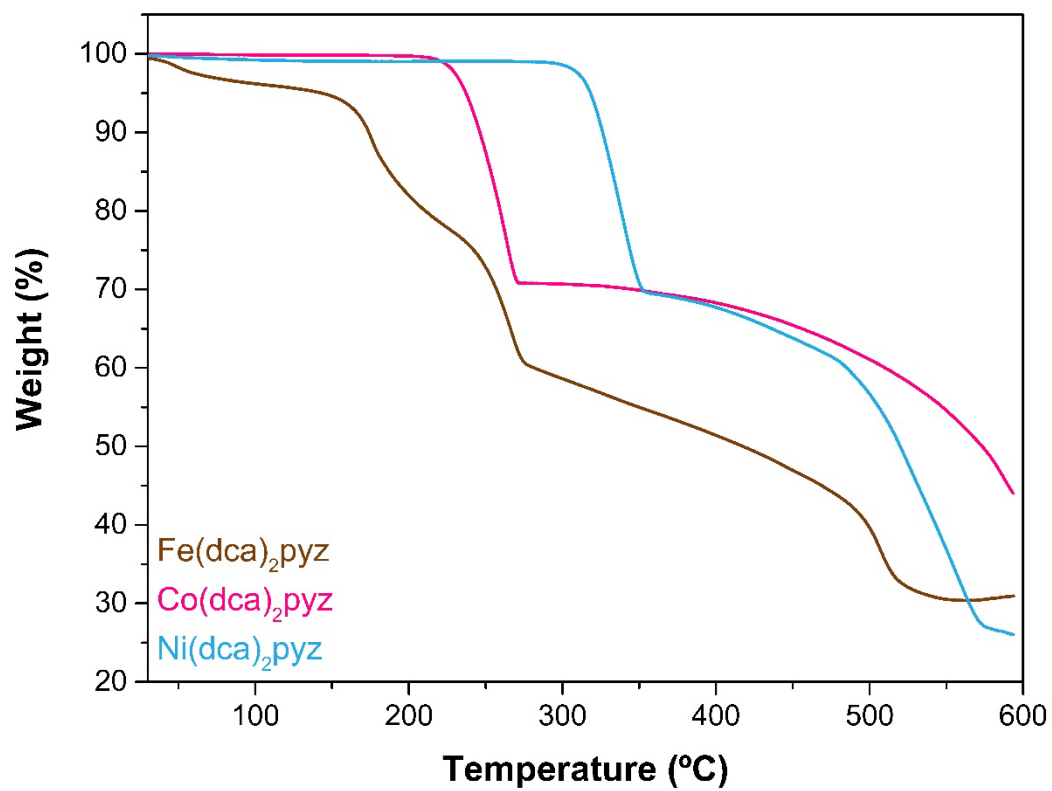

**Figure S4.** TGA curves of Fe(dca)<sub>2</sub>pyz (brown), Co(dca)<sub>2</sub>pyz (pink) and Ni(dca)<sub>2</sub>pyz (blue).

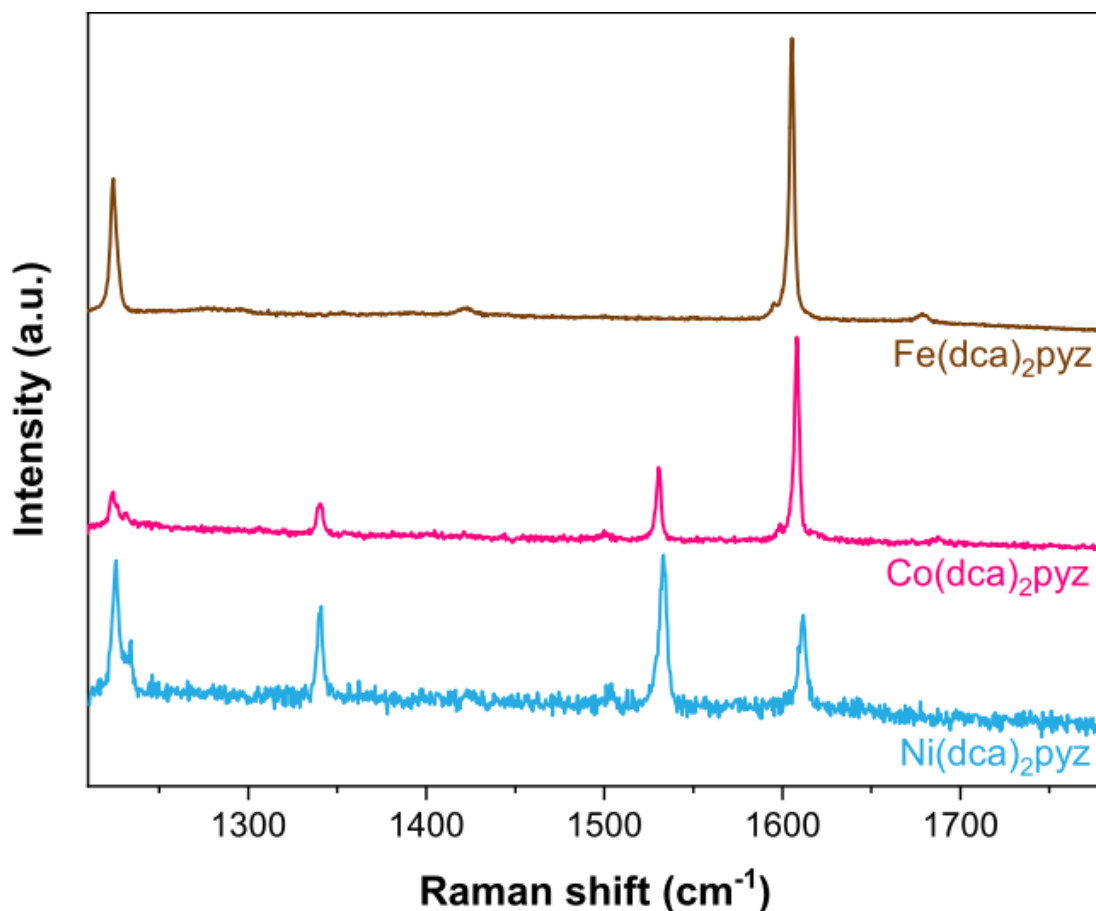

**Figure S5.** Raman spectra of the three MOFs in the region of D and G bands. The three MOFs show the two fundamental vibrations of  $A_g$  symmetry at  $\sim 1240\text{ cm}^{-1}$  and  $\sim 1600\text{ cm}^{-1}$ , assigned to the C-H in plane deformation ( $\delta_{9a}$ ) and the ring stretching ( $\nu_{8a}$ ), respectively.<sup>2</sup> The blue-shift observed for this last peak indicates stronger interaction between the N two electrons and the M, being  $\text{Fe} < \text{Co} < \text{Ni}$ . Also, two more bands appear in  $\text{Co(dca)}_2\text{pyz}$  and  $\text{Ni(dca)}_2\text{pyz}$ , at  $\sim 1340\text{ cm}^{-1}$  and  $\sim 1535\text{ cm}^{-1}$  plausibly attributed to C-H in plane deformation ( $\delta_3$ ) and the ring stretching ( $\nu_{8b}$ ) corresponding to  $B_{3g}$  symmetry. The enhancement of the  $B_{3g}$  symmetry modes, particularly 8b fundamental, is attributed to the vibronic coupling between the  $D_0$  and  $D_1$  states of the radical anion,<sup>3</sup> being more noticeable this effect for  $\text{Ni(dca)}_2\text{pyz}$ , in which the intensity of 8b band is higher than 8a band. These effects suggest that the interaction between Ni-pyz is stronger than Co-pyz and Fe-pyz.

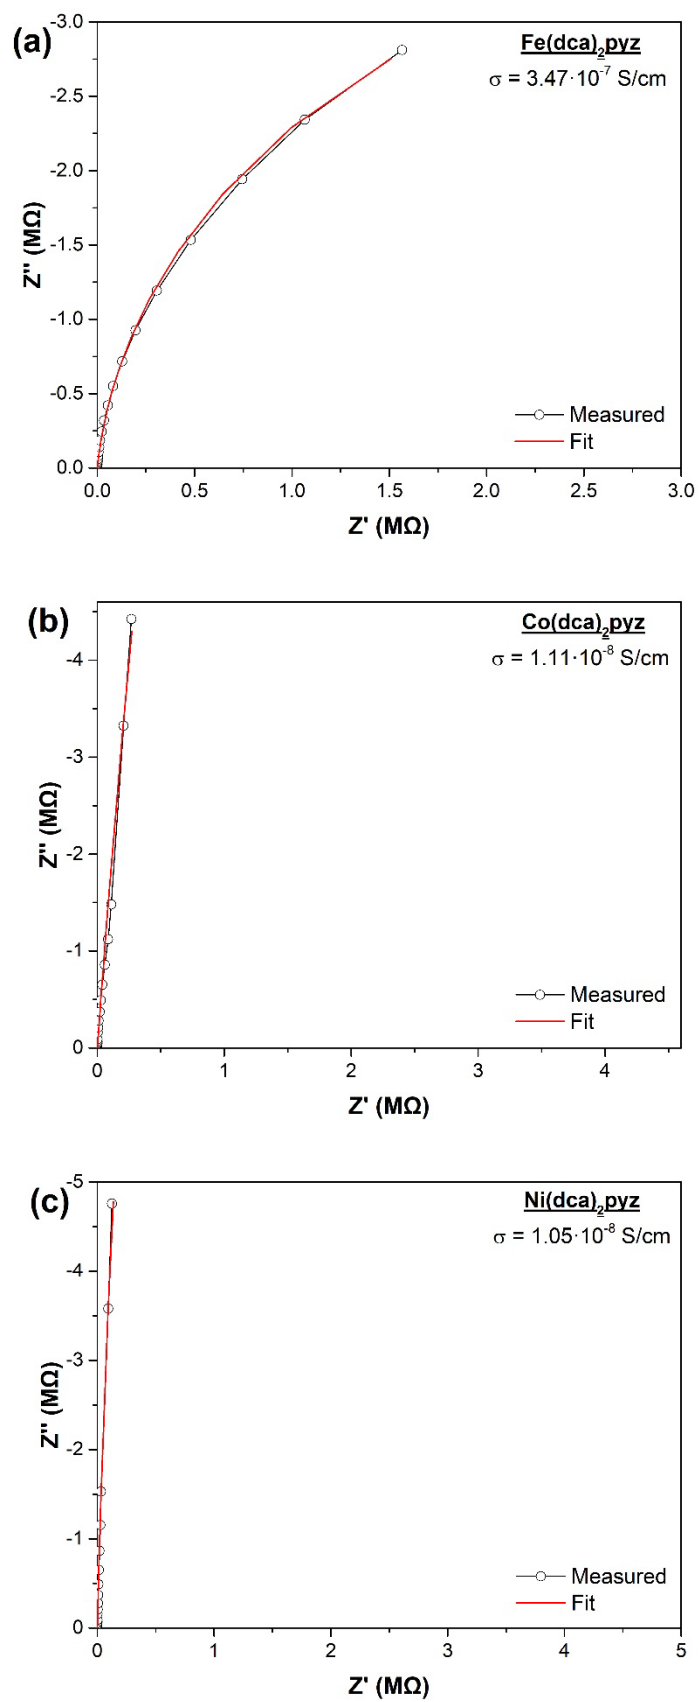

**Figure S6.** EIS spectra obtained at a pressure of 226 MPa and applying a voltage of 1 V and the fit of the powders **a)**  $\text{Fe(dca)}_2\text{pyz}$ , **b)**  $\text{Co(dca)}_2\text{pyz}$  and **c)**  $\text{Ni(dca)}_2\text{pyz}$ .



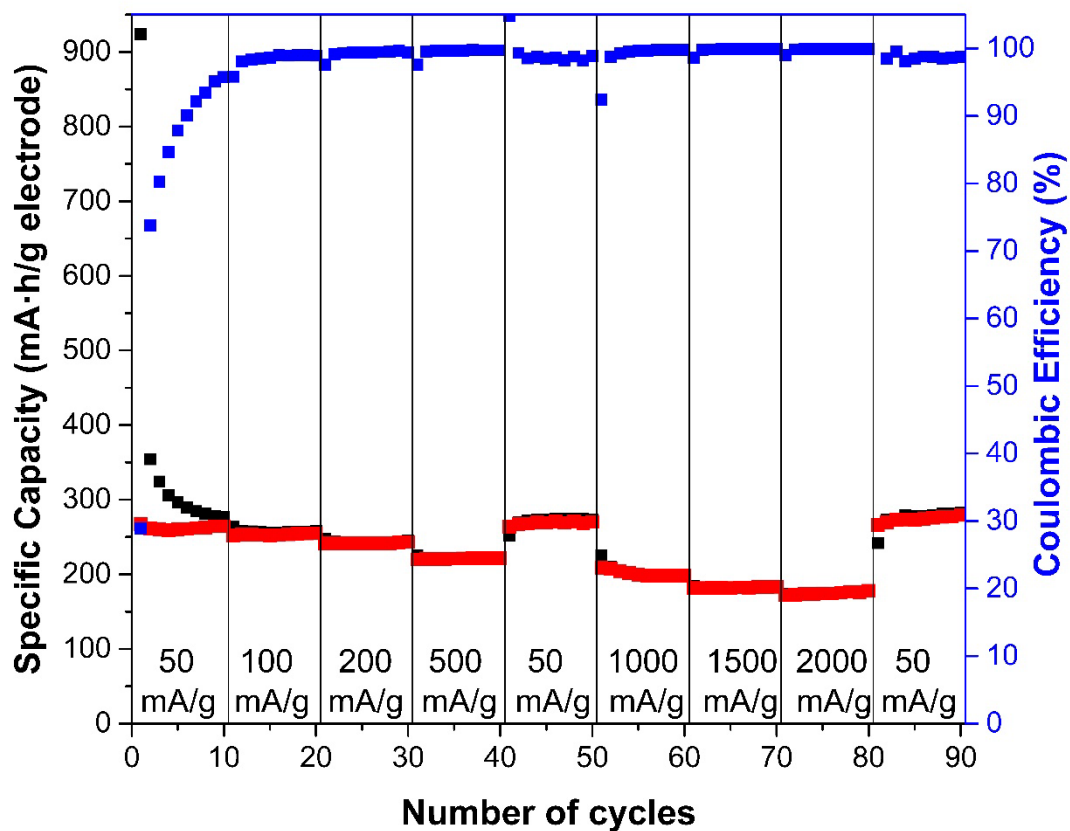

**Figure S7.** Lithiation (black) and delithiation (red) specific capacity and Coulombic Efficiency (blue) of an electrode composed of 95 % in weight of carbon black and 5 % in weight of polyvinylidene fluoride (the binder) at different rates. The current applied considers the mass of carbon black in the electrode whereas the specific capacity uses the mass of the complete electrode (it also considers the binder mass).

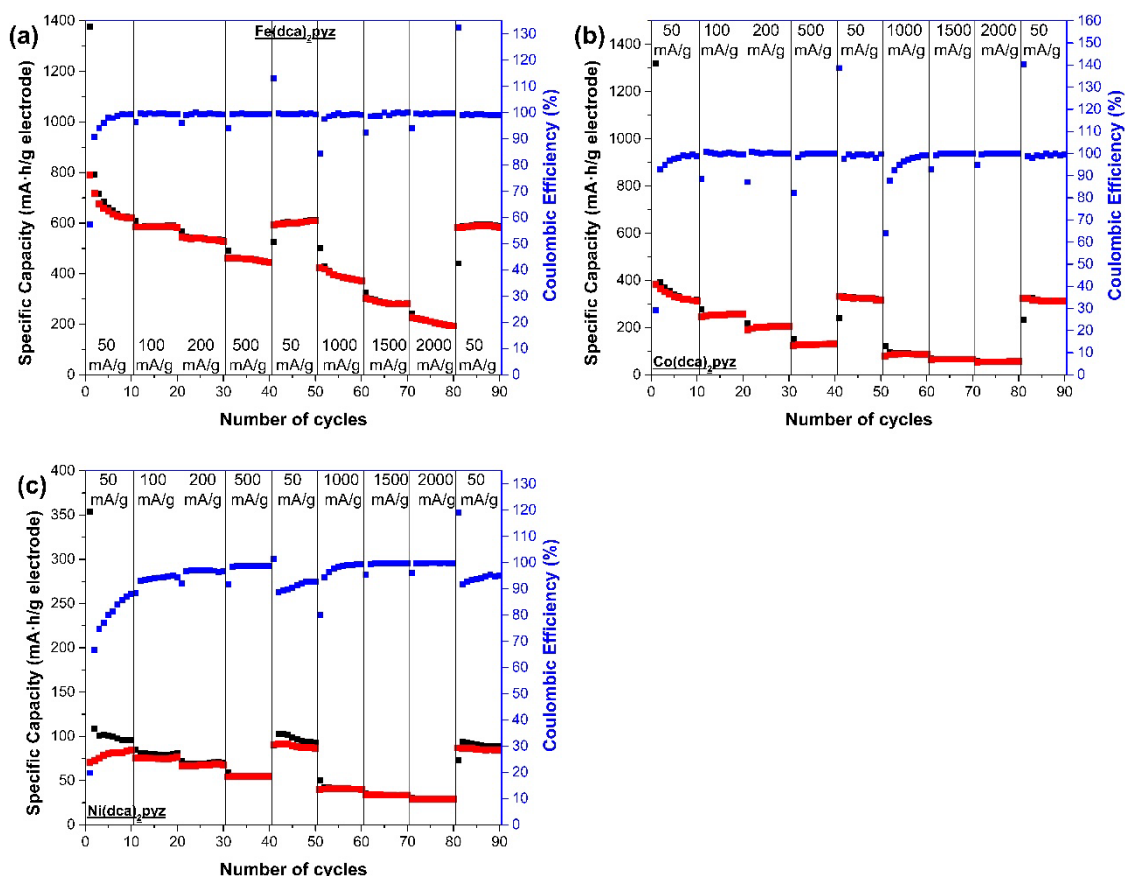

**Figure S8.** Lithiation (black) and delithiation (red) specific capacity and Coulombic Efficiency (blue) of the electrodes containing **a)** Fe(dca)<sub>2</sub>pyz, **b)** Co(dca)<sub>2</sub>pyz and **c)** Ni(dca)<sub>2</sub>pyz. The current applied considers the mass of the MOF in the electrode whereas the specific capacity uses the mass of the complete electrode (it also considers mass of the carbon additive and the binder).

Coulombic Efficiencies (CE) in the first cycle of Fe, Co, Ni electrodes are 57% (1376/789 mA<sub>h</sub>g<sup>-1</sup>), 29 % (1055/307 mA<sub>h</sub>g<sup>-1</sup>), and 20 % (354/70 mA<sub>h</sub>g<sup>-1</sup>), respectively. This low CE is a consequence of the formation of the solid electrolyte interface (SEI) by electrolyte-electrode surface reaction. In the subsequent lithiation/delithiation cycles the Coulombic Efficiency increases for the Fe(dca)<sub>2</sub>pyz and Co(dca)<sub>2</sub>pyz electrodes until approaching a value of 100 %. In contrast, Ni electrode presents lower CE values at low rates (~93 % at 50 mA/g) which increase with the applied current until they reach values higher than 99 % at 1000 mA/g.

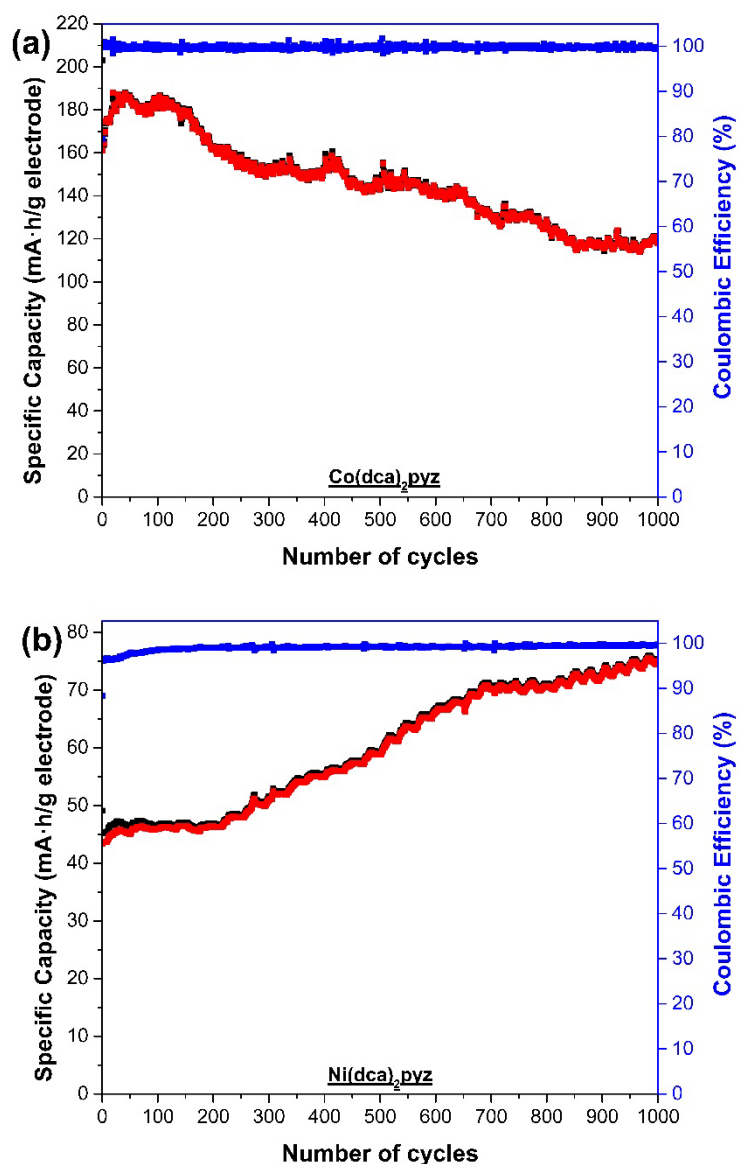

**Figure S9.** Rate performance at 200 mA/g of the electrodes containing **a)** Co(dca)<sub>2</sub>pyz and **b)** Ni(dca)<sub>2</sub>pyz showing the lithiation (black) and delithiation (red) specific capacity and the Coulombic Efficiency (blue). 10 conditioning cycles at 50 mA/g have been done before these cycles. The current applied considers the mass of the MOF in the electrode whereas the specific capacity uses the mass of the complete electrode (it also considers mass of the carbon additive and the binder).

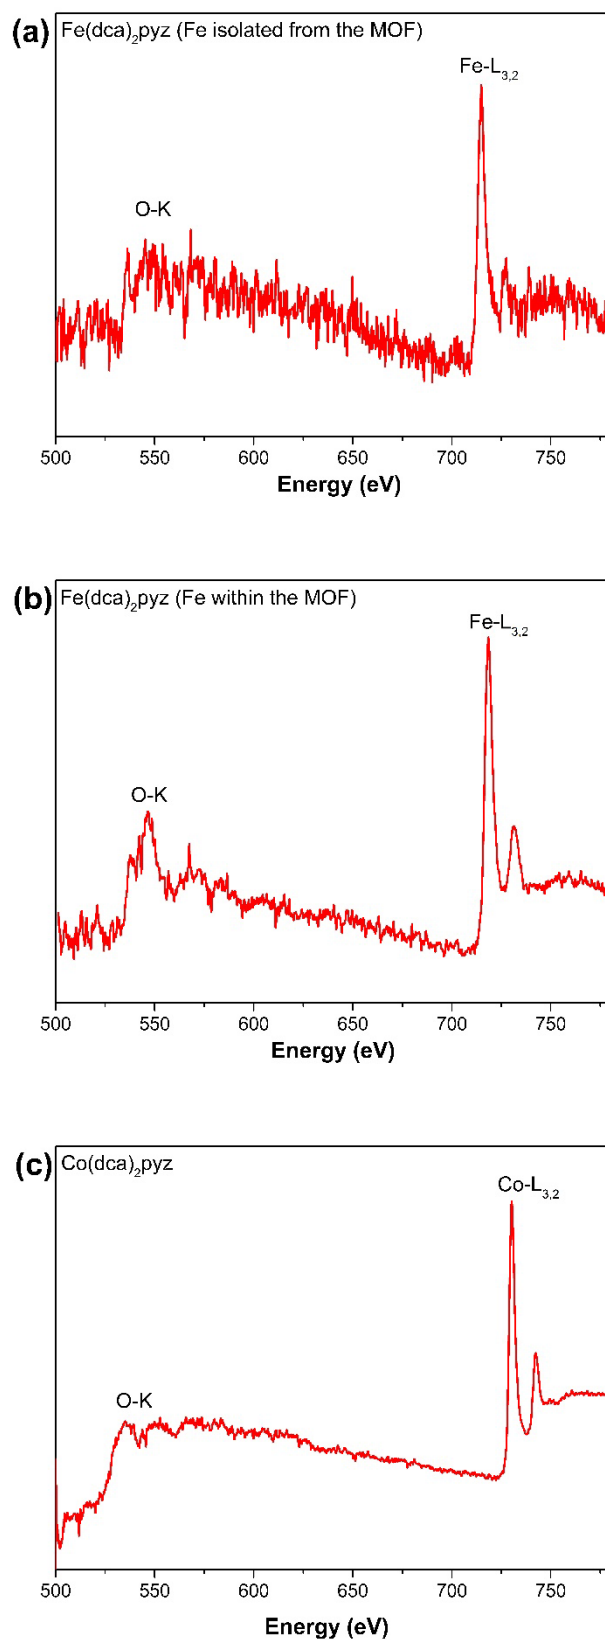

**Figure S10.** EEL spectra of **a)** isolated Fe from Fe(dca)<sub>2</sub>pyz, **b)** Fe within the MOF Fe(dca)<sub>2</sub>pyz and **c)** Co(dca)<sub>2</sub>pyz.

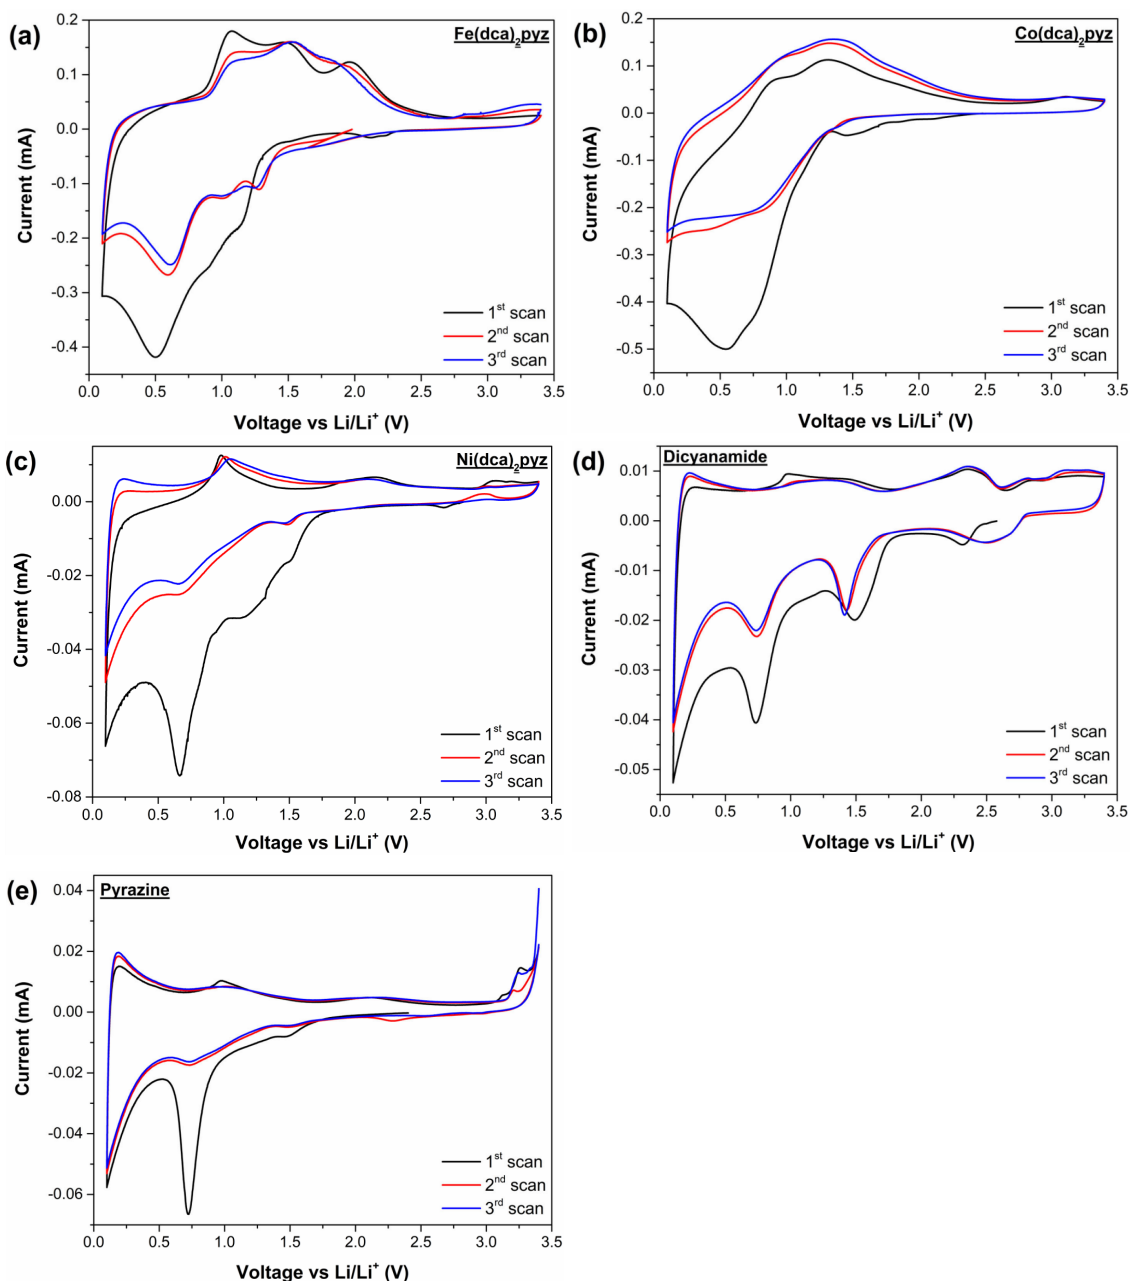

**Figure S11.** First three CVs obtained at a scan rate of 0.1 mV/s of the compounds **a)** Fe(dca)<sub>2</sub>pyz, **b)** Co(dca)<sub>2</sub>pyz and **c)** Ni(dca)<sub>2</sub>pyz, and their ligands **d)** dicyanamide and **e)** pyrazine.

Both ligands present two cathodic peaks at 0.75 V and 0.1 V vs Li/Li<sup>+</sup>. Moreover, dca shows an additional cathodic peak at ~1.5V vs Li/Li<sup>+</sup>, assigned to the interaction of Li<sup>+</sup> with dca central N, the preferred position for the alkaline metal in dicyanamide salts.<sup>4</sup> The peak at 0.75V is allocated to SEI formation and it diminishes rapidly after the first cycle, being more notable in the pyz ligand. Conversely, in dca, the peak remains intense and reproducible in the second and third cycles, suggesting an additional redox process around 0.7 V vs Li/Li<sup>+</sup>. This behavior, prominently observed in dca and minimally in pyz, likely relates to the interaction of Li<sup>+</sup> ions with their terminal N. The last peak at 0.1V

indicates the stabilization of  $\text{Li}^+$  ions with delocalized  $\pi$  electrons from double/triple bonds in dca, and from the aromatic ring in pyz. Despite the observation of these peaks in the CV, the specific capacities (Figure S12) remain low, which means that polymerization within coordinated polymers through TM nodes improves the storage capacity of  $\text{Li}^+$  ions.

The Ni-MOF shows after the SEI formation in the first cycle, a main peak at 0.1 V where  $\text{Li}^+$  ions intercalate and interact with  $\pi$  electrons from the ligands. In the case of Fe-MOF the largest peak appears at  $\sim 0.5$  V, and two smaller peaks at  $\sim 1$  V and  $\sim 1.5$  V, related to the reduction of Fe nodes and interaction between Li and the N of the ligands. Co-MOF shows a broad CV peak below  $\sim 1.3$  V, instead of well-defined peaks, suggesting that the limitation arises from kinetic constraints. The significantly lower electrical conductivity of Co-MOF, compared to Fe-MOF, may impede charge compensation and lead to electrostatic repulsions.<sup>5</sup>

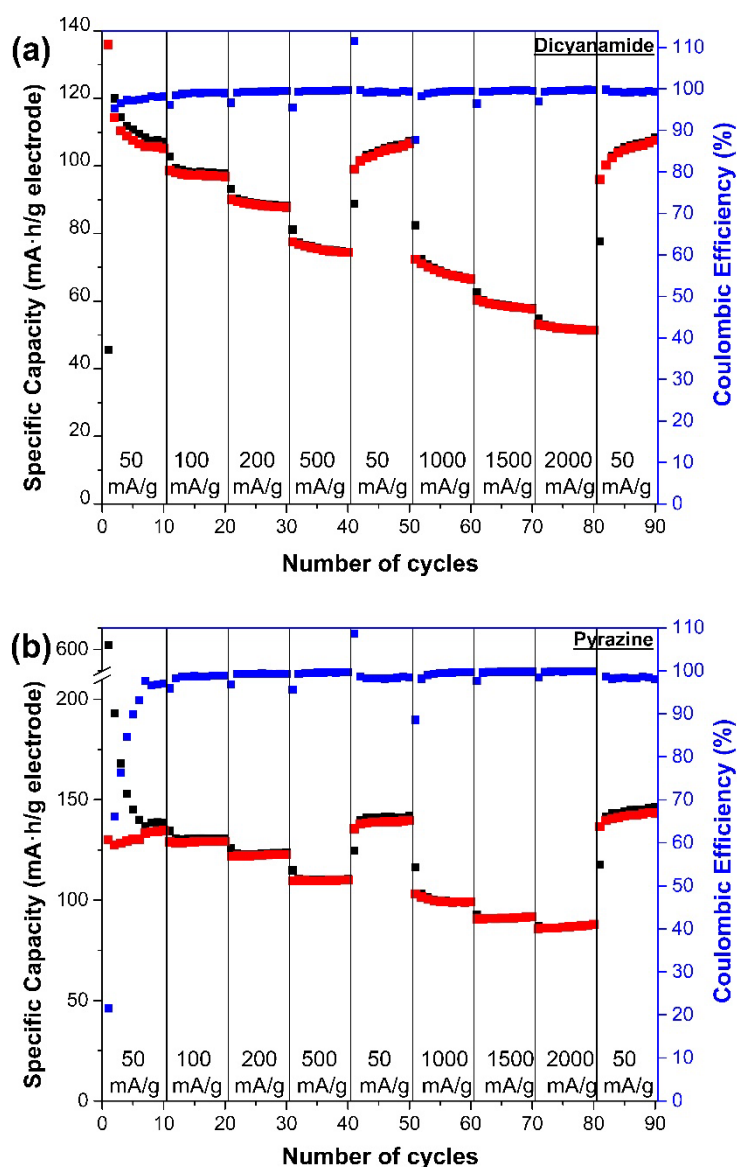

**Figure S12.** Lithiation (black) and delithiation (red) specific capacity and Coulombic Efficiency (blue) of the ligands **a)** dicyanamide and **b)** pyrazine. The current applied considers the mass of the ligand in the electrode whereas the specific capacity uses the mass of the complete electrode (it also considers mass of the carbon additive and the binder).

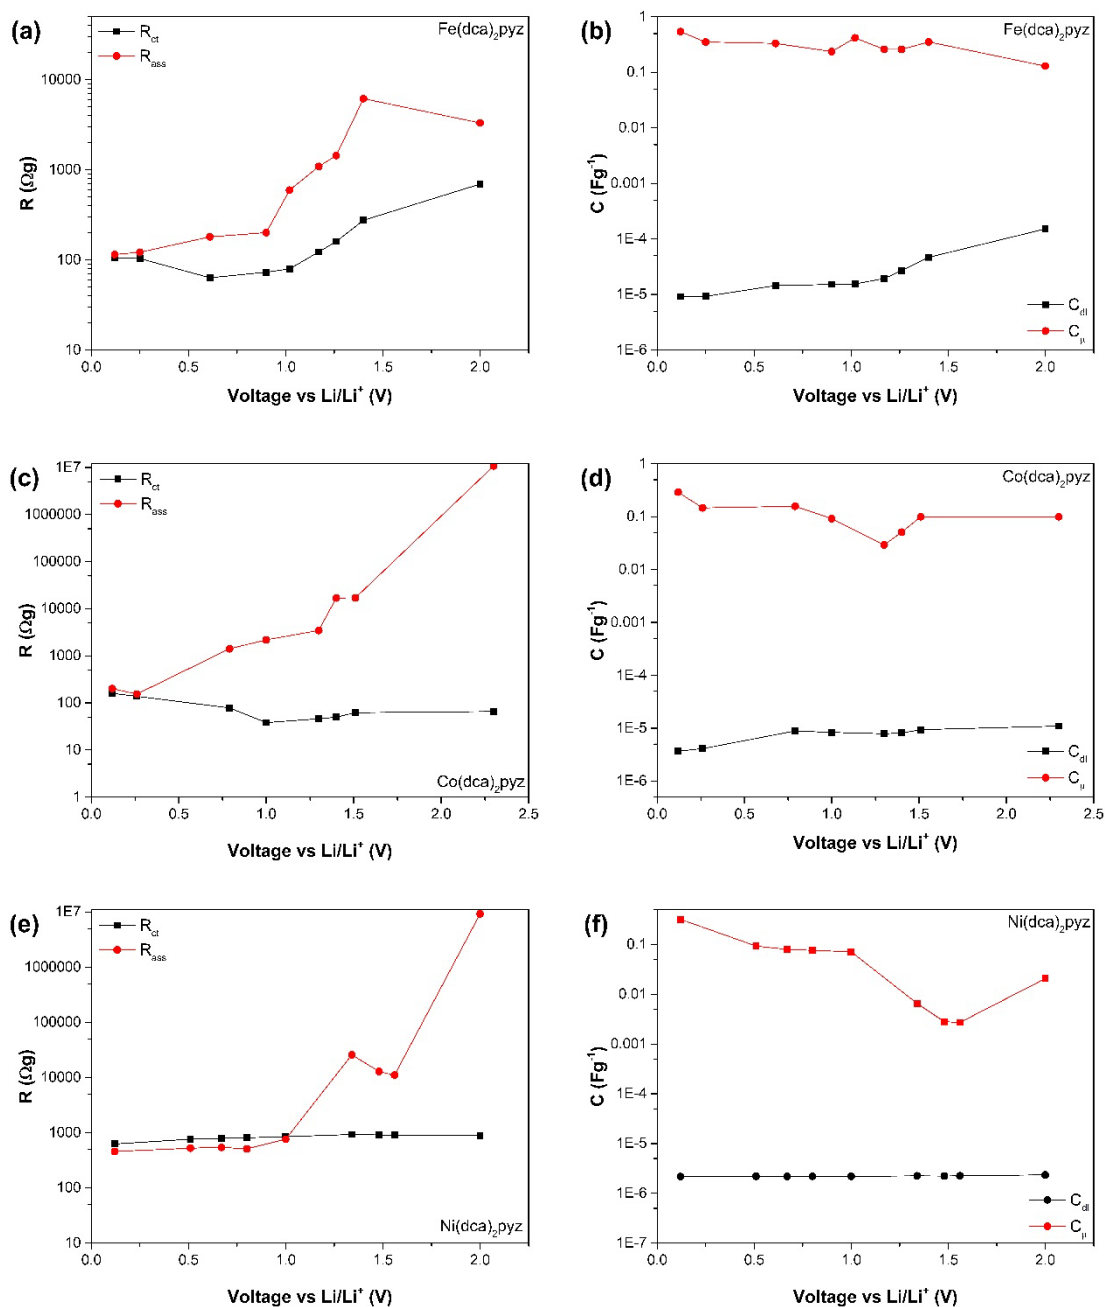

**Figure S13.** Calculated resistances (a), c) and e)) and capacitances (b), d) and f)) fitted for the equivalent circuit model illustrated in Figure 7. The resistances obtained in the Fe-MOF range between 10 and  $10^4 \Omega\text{g}$ . Co-MOF and Ni-MOF show resistances up to  $10^7 \Omega\text{g}$ . Although at low voltages when  $\text{Li}^+$  ions are intercalated the resistance in both MOFs decreases, the chemical capacitances remain practically an order of magnitude below that of Fe-MOF. This indicates that not only kinetic restrains are responsible of the lower capacities registered during charging/discharging cycles, but also thermodynamic ones, probably due to the strength of the M-N binding energy.



**Table S1.** Comparison of Li<sup>+</sup> storage capacity of our materials with reported literature of TMNs.

| Active material             | Active material:<br>Carbon additive:<br>PVDF | Voltage range (V) | Rate (mA/g) | Reversible capacity (mAh/g) | Number of cycles | Reference |
|-----------------------------|----------------------------------------------|-------------------|-------------|-----------------------------|------------------|-----------|
| Fe <sub>2</sub> N@CNFs      | 80:10:10                                     | 3-?               | 100         | 100                         | 60               | 6         |
| Co <sub>2</sub> N@CNFs      | 80:10:10                                     | 3-?               | 100         | 563                         | 50               |           |
| Fe <sub>3</sub> N@C         | 80:10:10                                     | 2-0.01            | 100         | 358                         | 500              | 7         |
| Fe <sub>2</sub> N@C in CSHN | 70:20:10                                     | 3-?               | 200         | ~600                        | 200              | 8         |
|                             |                                              |                   | 5000        | ~600                        | 1000             |           |
| Fe <sub>2</sub> N/rGO       | 85:5:10                                      | 3-0.005           | 100         | 578                         | 500              | 9         |
| Fe <sub>2</sub> N/rGO       | 80:10:10                                     | 3-0.01            | 200         | 378                         | 200              | 10        |
|                             |                                              |                   | 500         | 368                         | 200              |           |
| Fe <sub>3</sub> N/rGO       | 80:10:10                                     | 3-0.01            | 200         | 615                         | 200              |           |
|                             |                                              |                   | 500         | 513                         | 200              |           |
| Fe <sub>2</sub> N@C-rGO     | 80:10:10                                     | 3-0.01            | 100         | 760                         | 100              | 11        |
| FeN/N-rGO                   | 80:10:10                                     | 3-0.01            | 50          | 698                         | 50               | 12        |
|                             |                                              |                   | 100         | ~560                        | 100              |           |
| CoN/N-rGO                   | 80:10:10                                     | 3-0.01            | 50          | 730                         | 80               |           |
| FeCoN/N-rGO                 | 80:10:10                                     | 3-0.01            | 100         | 520                         | 60               |           |
| NiN/N-rGO                   | 80:10:10                                     | 3-0.01            | 50          | 667                         | 80               |           |

|                                             |          |         |                    |        |      |           |
|---------------------------------------------|----------|---------|--------------------|--------|------|-----------|
| (Ni/Co) <sub>3</sub> N<br>MC@HC             | 70:20:10 | 3-0.01  | 200                | 440    | 130  | 13        |
|                                             |          |         | 500                | 170    | 130  |           |
| om-CoN                                      | 80:10:10 | 3-0.01  | 1000               | 710    | 350  | 14        |
|                                             |          |         | 2000               | 300    | 2000 |           |
| NiCo <sub>2</sub> N@C-<br>NCNT              | 70:20:10 | 3-0.01  | 200                | 750.6  | 500  | 15        |
|                                             |          |         | 2000               | 569.1  | 500  |           |
| Porous CoN                                  | 70:15:15 | 3-0.005 | 250                | 660    | 60   | 16        |
|                                             |          |         | 1000               | 470    | 60   |           |
| CoN                                         | 70:15:15 | 3-0.005 | 60                 | 956    | 60   | 17        |
| Ni <sub>3</sub> N                           | 84:8:8   | 3-0.001 | 1 Li in 5<br>hours | ~530   | 10   | 18        |
|                                             |          |         | 1 Li in 1<br>hour  | ~430   | 10   |           |
| NiCo <sub>2</sub> N                         | 70:20:10 | 3-0.01  | 1000               | 1244.5 | 400  | 19        |
| Ni <sub>3</sub> N-<br>Co <sub>3</sub> N@CNT | 70:20:10 | 3-?     | 400                | 553.3  | 600  | 20        |
| Co <sub>3</sub> N@CNT                       | 70:20:10 | 3-?     | 400                | 249.8  | 600  |           |
| Ni <sub>3</sub> N@CNT                       | 70:20:10 | 3-?     | 400                | 327.4  | 600  |           |
| Fe(dca) <sub>2</sub> pyz                    | 80:15:5  | 3-0.1   | 200                | 649.1  | 450  | This work |
| Co(dca) <sub>2</sub> pyz                    | 80:15:5  | 3-0.1   | 200                | 184.5  | 450  |           |
|                                             |          | 3-0.1   | 200                | 147.4  | 1000 |           |
| Ni(dca) <sub>2</sub> pyz                    | 80:15:5  | 3-0.1   | 200                | 71.5   | 450  |           |
|                                             |          | 3-0.1   | 200                | 94.2   | 1000 |           |

CNFs = Carbon Nanosheet Frameworks

C = Carbon-constraint

CSHN = Core-Shell Hybrid Fibers

rGO = reduced Graphene Oxide

MC@HC = Multi-Core@Hollow Carbon shell

om = ordered mesoporous

NCNT = Nitrogen-doped Carbon NanoTubes

CNT = Carbon NanoTubes

**Table S2.** Comparison of Li<sup>+</sup> storage capacity of our materials with reported literature of Fe, Co and Ni-MOFs.

| Active material                                                                                        | Active material: Carbon additive: PVDF | Voltage range (V) | Rate (mA/g) | Reversible capacity (mAh/g) | Number of cycles | Reference |
|--------------------------------------------------------------------------------------------------------|----------------------------------------|-------------------|-------------|-----------------------------|------------------|-----------|
| Fe(OH)(BDC)                                                                                            | 70:20:10                               | 3-0.01            | 100         | 310                         | 100              | 21        |
| Fe(1,4-Dicarboxybenzene)                                                                               | 70:20:10                               | 3-0.01            | 500         | ~930                        | 200              | 22        |
| [Fe <sub>3</sub> O(BDC) <sub>3</sub> (H <sub>2</sub> O) <sub>2</sub> (NO <sub>3</sub> ) <sub>n</sub> ] | 60:30:10                               | 3-0.005           | 60          | 744.5                       | 400              | 23        |
| PCN-600                                                                                                | 60:30:10                               | 3-0               | 400         | ~1000*                      | 300              | 24        |
| mFeP-NM                                                                                                | 60:30:10                               | 3-0.001           | 200         | 300                         | 350              | 25        |
| Co <sub>2</sub> (NDC) <sub>2</sub> (DMF) <sub>2</sub>                                                  | 55:35:10                               | 3-0.01            | 200         | 623.6                       | 100              | 26        |
| [Co <sub>2</sub> (py-TTF-py) <sub>2</sub> (BDC) <sub>2</sub> ·2DMF·H <sub>2</sub> O]                   | 60:30:10                               | 3-0.01            | 200         | 1186.6                      | 287              | 27        |
|                                                                                                        |                                        |                   | 1000        | 1043.8                      | 234              |           |
|                                                                                                        |                                        |                   | 5000        | 758.6                       | 313              |           |
| [Co <sub>2</sub> (py-TTF-py) <sub>2</sub> (BPDC) <sub>2</sub> ·3DMF·3H <sub>2</sub> O]                 | 60:30:10                               | 3-0.01            | 200         | 1054.6                      | 174              |           |
| Co <sub>2</sub> (OH) <sub>2</sub> BDC                                                                  | 70:25:5                                | 3-0.01            | 100         | 948                         | 100              | 28        |
| Co(HNA) <sub>2</sub> (H <sub>2</sub> O) <sub>4</sub>                                                   | 70:20:10                               | 3-0.01            | 100         | 455                         | 60               | 29        |
| [Co(HNA)] <sub>n</sub>                                                                                 | 70:20:10                               | 3-0.01            | 100         | 618                         | 100              |           |
| Ni(HNA) <sub>2</sub> (H <sub>2</sub> O) <sub>4</sub>                                                   | 70:20:10                               | 3-0.01            | 100         | 411                         | 60               |           |
| [Ni(HNA)] <sub>n</sub>                                                                                 | 70:20:10                               | 3-0.01            | 100         | 610                         | 100              |           |
| Ni(4,4'-bpy)(tfbdc)(H <sub>2</sub> O) <sub>2</sub>                                                     | 60:30:10                               | 3-0.01            | 50          | 406                         | 50               | 30        |
| Ni <sub>3</sub> (HITP) <sub>2</sub>                                                                    | 70:20:10                               | 3-0.01            | 1000        | 712                         | 200              | 31        |
|                                                                                                        |                                        |                   | 2000        | ~501                        | 500              |           |
|                                                                                                        |                                        |                   | 5000        | 362                         | 500              |           |
| Fe(dca) <sub>2</sub> pyz                                                                               | 80:15:5                                | 3-0.1             | 200         | 649.1                       | 450              | This work |
| Co(dca) <sub>2</sub> pyz                                                                               | 80:15:5                                | 3-0.1             | 200         | 184.5                       | 450              |           |
|                                                                                                        |                                        | 3-0.1             | 200         | 147.4                       | 1000             |           |
| Ni(dca) <sub>2</sub> pyz                                                                               | 80:15:5                                | 3-0.1             | 200         | 71.5                        | 450              |           |
|                                                                                                        |                                        | 3-0.1             | 200         | 94.2                        | 1000             |           |

PCN-600 = iron porphyrin-based MOF

BDC = 1,4-benzenedicarboxylate

mFeP-NM = mesoporous ferric phytate nanomeshes DMF = N,N -dimethylformamide

NDC = 1,4-naphthalene dicarboxylate

H<sub>2</sub>BDC = terephthalic acid

py-TTF-py = 2,6-bis(4'-pyridyl)tetrathiafulvalene

H<sub>2</sub>NA = 5-hydroxynicotinic acid

H<sub>2</sub>BPDC = biphenyl-4,4'-dicarboxylic acid

4,4'-bpy = 4,4'-bipyridine

H<sub>2</sub>tfbdc = tetrafluoroterephthalic acid

HITP = 2,3,6,7,10,11-hexaaminotriphenylene

\*The mass of the conductive additive is considered to calculate the specific capacity.

## References

- 1 P. Jensen, S. R. Batten, B. Moubaraki and K. S. Murray, *J. Solid State Chem.*, 2001, **159**, 352–361.
- 2 Q. J. Huang, J. L. Yao, B. W. Mao, R. A. Gu and Z. Q. Tian, *Chem. Phys. Lett.*, 1997, **271**, 101–106.
- 3 J. F. Arenas, M. S. Woolley, I. Ló Pez Tocó, J. C. Otero and J. I. Marcos, 2000, **112**, 7669–7683.
- 4 O. Reckeweg, F. J. Disalvo, A. Schulz, B. Blaschkowski, S. Jagiella and T. Schleid, *Zeitschrift fur Anorg. und Allg. Chemie*, 2014, **640**, 851–855.
- 5 P. Mao, H. Fan, C. Liu, G. Lan, W. Huang, Z. Li, H. Mahmoud, R. Zheng, Z. Wang, H. Sun and Y. Liu, *Sustain. Energy Fuels*, 2022, **6**, 4075–4084.
- 6 Y. Dong, Y. Li, H. Shi, J. Qin, S. Zheng, R. He and Z. S. Wu, *Carbon N. Y.*, 2020, **159**, 213–220.
- 7 H. Huang, S. Gao, A. M. Wu, K. Cheng, X. N. Li, X. X. Gao, J. J. Zhao, X. L. Dong and G. Z. Cao, *Nano Energy*, 2017, **31**, 74–83.
- 8 X. Li, C. Deng, H. Wang, J. Si, S. Zhang and B. Huang, *ACS Appl. Mater. Interfaces*, 2021, **13**, 7297–7307.
- 9 M. Idrees, A. S. Haidyrah, Ata-ur-Rehman, Q. Zhang, X. Li and S. M. Abbas, *J. Alloys Compd.*, 2021, **883**, 160824.
- 10 L. Tian, Y. Xie, J. Lu, T. Liu, Q. Hu, Y. Xiao, X. Zhu and X. Su, *J. Alloys Compd.*, 2022, **922**, 166208.
- 11 P. Yu, L. Wang, F. Sun, D. Zhao, C. Tian, L. Zhao, X. Liu, J. Wang and H. Fu, *Chem. - A Eur. J.*, 2015, **21**, 3249–3256.
- 12 L. Lai, J. Zhu, B. Li, Y. Zhen, Z. Shen, Q. Yan and J. Lin, *Electrochim. Acta*, 2014, **134**, 28–34.
- 13 B. K. Kang, Y. J. Choi, H. W. Choi, S. Bin Kwon, S. Kim, Y. J. Kim, J. S. Park, W. S. Yang, D. H. Yoon and W. H. Ryu, *Chem. Eng. J.*, 2021, **420**, 129630.
- 14 G. Jiang, H. Han, W. Zhuang, X. Xu, S. Kaskel, F. Xu and H. Wang, *J. Mater. Chem. A*, 2019, **7**, 17561–17569.
- 15 R. Zou, M. Xu, S. A. He, X. Han, R. Lin, Z. Cui, G. He, D. J. L. Brett, Z. X. Guo,

- J. Hu and I. P. Parkin, *J. Mater. Chem. A*, 2018, **6**, 19853–19862.
- 16 B. Das, M. V. Reddy, G. V. S. Rao and B. V. R. Chowdari, *J. Mater. Chem.*, 2012, **22**, 17505–17510.
- 17 M. V. Reddy, G. Prithvi, K. P. Loh and B. V. R. Chowdari, *ACS Appl. Mater. Interfaces*, 2014, **6**, 680–690.
- 18 F. Gillot, J. Oró-Solé and M. R. Palacín, *J. Mater. Chem.*, 2011, **21**, 9997–10002.
- 19 P. Wang, J. Bai, K. Li, H. Ma, W. Li, X. Zhu, Y. Sun and B. Zhao, *Chem. Eng. J.*, 2021, **425**, 130607.
- 20 H. Zhou, Z. Li, K. Wang, M. Gao and S. Ding, *J. Mater. Chem. A*, 2019, **7**, 1779–1784.
- 21 C. Zhang, W. Hu, H. Jiang, J. K. Chang, M. Zheng, Q. H. Wu and Q. Dong, *Electrochim. Acta*, 2017, **246**, 528–535.
- 22 Y. Jin, C. Zhao, Z. Sun, Y. Lin, L. Chen, D. Wang and C. Shen, *RSC Adv.*, 2016, **6**, 30763–30768.
- 23 L. Shen, H. Song and C. Wang, *Electrochim. Acta*, 2017, **235**, 595–603.
- 24 L. Sun, J. Xie, Z. Chen, J. Wu and L. Li, *Dalt. Trans.*, 2018, **47**, 9989–9993.
- 25 Y. Ai, Z. Han, X. Jiang, H. Luo, J. Cui, Q. Bao, C. Jing, J. Fu, J. Cheng and S. Liu, *Small*, 2020, **16**, 2002701.
- 26 L. Gou, L. Ma, M. J. Zhao, P. G. Liu, X. D. Wang, X. Y. Fan and D. L. Li, *J. Mater. Sci.*, 2019, **54**, 1529–1538.
- 27 Y. G. Weng, Z. H. Ren, Z. R. Zhang, J. Shao, Q. Y. Zhu and J. Dai, *Inorg. Chem.*, 2021, **60**, 17074–17082.
- 28 C. Li, X. Lou, Q. Yang, Y. Zou and B. Hu, *Chem. Eng. J.*, 2017, **326**, 1000–1008.
- 29 H. Liu, H. Li, F. Cheng, W. Shi, J. Chen and P. Cheng, *Inorg. Chem.*, 2018, **57**, 10640–10648.
- 30 C. Shi, X. Wang, Y. Gao, H. Rong, Y. Song, H. J. Liu and Q. Liu, *J. Solid State Electrochem.*, 2017, **21**, 2415–2423.
- 31 A. Nazir, H. T. T. Le, A. G. Nguyen and C. J. Park, *Electrochim. Acta*, 2021, **389**, 138750.
